# Supplementary material for: Microfoundations of R&D Alliance Formation: The Interplay of Scientist Mobility and the Cooperative Context of Collaboration
Source: Atypon-hosted journal article supplement (doi:10.1287/stsc.2021.0127), 2021-04-19
Supplement: stsc.2021.0127.sm1.pdf [file stsc.2021.0127.sm1.pdf]

## Online Appendix A. Two-Stage Least Squares (2SLS) Estimation Results

| Variables                                     | OLS first Stage      | 2SLS<br>(using ivreg2 in STATA) |                      |                      |                      |
|-----------------------------------------------|----------------------|---------------------------------|----------------------|----------------------|----------------------|
| Scientist Mobility x<br>Absence of Colocation |                      |                                 |                      | 0.077**<br>(0.036)   | 0.071**<br>(0.035)   |
| Scientist Mobility x<br>Absence of Ties       |                      |                                 | 0.086**<br>(0.039)   |                      | 0.084**<br>(0.041)   |
| Scientist Mobility                            |                      | 0.064**<br>(0.030)              | 0.074**<br>(0.039)   | 0.069**<br>(0.033)   | 0.083*<br>(0.049)    |
| Weather Conditions                            | 0.004***<br>(0.000)  |                                 |                      |                      |                      |
| Crime Rates                                   | 0.001***<br>(0.000)  |                                 |                      |                      |                      |
| Absence of Ties                               | -0.061***<br>(0.015) | -0.018***<br>(0.004)            | -0.017***<br>(0.004) | -0.019***<br>(0.004) | -0.016***<br>(0.004) |
| Absence of Colocation                         | -0.009***<br>(0.003) | -0.001***<br>(0.000)            | -0.001***<br>(0.000) | -0.001*<br>(0.001)   | -0.001*<br>(0.000)   |
| Technology Similarity                         | 0.008***<br>(0.002)  | 0.001***<br>(0.001)             | 0.002***<br>(0.000)  | 0.001***<br>(0.000)  | 0.001***<br>(0.000)  |
| Alliance Experience                           | 0.005**<br>(0.002)   | 0.003***<br>(0.001)             | 0.003***<br>(0.001)  | 0.003***<br>(0.001)  | 0.003***<br>(0.000)  |
| Patents                                       | 0.003***<br>(0.001)  | 0.000<br>(0.000)                | 0.000<br>(0.000)     | 0.000<br>(0.000)     | 0.000<br>(0.000)     |
| Age                                           | 0.000<br>(0.000)     | -0.000<br>(0.000)               | -0.000<br>(0.000)    | -0.000<br>(0.000)    | -0.000<br>(0.000)    |
| Therapeutic Area Effects                      | 2.37*<br>(0.000)     | 16.71*<br>(0.000)               | 11.90<br>(0.000)     | 10.68<br>(0.000)     | 11.71<br>(0.000)     |
| Patent Class Effects                          | 6.89***<br>(0.000)   | 17.27*<br>(0.000)               | 17.30*<br>(0.000)    | 17.00*<br>(0.000)    | 17.32*<br>(0.000)    |
| Year Effects                                  | 24.37***<br>(0.000)  | 43.59***<br>(0.000)             | 42.81***<br>(0.000)  | 42.92***<br>(0.000)  | 42.89***<br>(0.000)  |
| Firm State Effects                            | 50.86***<br>(0.000)  | 102.00***<br>(0.000)            | 146.38***<br>(0.000) | 106.71***<br>(0.000) | 165.50***<br>(0.000) |
| Partner State Effects                         | 130.60***<br>(0.000) | 127.74***<br>(0.000)            | 226.14***<br>(0.000) | 240.06***<br>(0.000) | 238.26***<br>(0.000) |
| Intercept                                     | 0.063***<br>(0.013)  | 0.019***<br>(0.003)             | 0.021***<br>(0.003)  | 0.020***<br>(0.003)  | 0.019***<br>(0.003)  |
| N                                             | 234,786              | 234,786                         | 234,786              | 234,786              | 234,786              |
| R-squared                                     | 0.035                | 0.007                           | 0.008                | 0.008                | 0.010                |

Notes. Clustered standard errors are in parentheses. \*\*\*  $p < 0.01$ , \*\*  $p < 0.05$ , \*  $p < 0.10$ .  
Chi-Squared values for joint significance of fixed effects.

**Online Appendix B1. Average Treatment Effects Analyses of Scientist Mobility**

| <b>Panel (a)</b>   | Model 1        |         | Model 2        |         | Model 3        |         |
|--------------------|----------------|---------|----------------|---------|----------------|---------|
|                    | PSM            | P > z   | IPW            | P > z   | IPWRA          | P > z   |
| Scientist Mobility | 0.089          | (0.045) | 0.091          | (0.010) | 0.094          | (0.007) |
| SE                 | (0.044)        |         | (0.035)        |         | (0.035)        |         |
| 95% CI             | [0.002, 0.176] |         | [0.022, 0.161] |         | [0.025, 0.163] |         |

**Online Appendix B2. Conditional Average Treatment Effects Analyses of Scientist Mobility**

| <b>Panel (b)</b> | Model 1         |         | Model 2         |         | Model 3         |         |
|------------------|-----------------|---------|-----------------|---------|-----------------|---------|
|                  | PSM             | P > z   | IPW             | P > z   | IPWRA           | P > z   |
| Absence of Ties  | 0.092           | (0.010) | 0.092           | (0.010) | 0.101           | (0.005) |
| SE               | (0.036)         |         | (0.036)         |         | (0.036)         |         |
| 95% CI           | [0.021, 0.163]  |         | [0.021, 0.163]  |         | [0.030, 0.173]  |         |
| Presence of Ties | 0.004           | (0.629) | 0.025           | (0.261) | 0.028           | (0.220) |
| SE               | (0.009)         |         | (0.022)         |         | (0.023)         |         |
| 95% CI           | [-0.022, 0.013] |         | [-0.018, 0.068] |         | [-0.016, 0.073] |         |

| <b>Panel (c)</b>       | Model 1         |         | Model 2         |         | Model 3         |         |
|------------------------|-----------------|---------|-----------------|---------|-----------------|---------|
|                        | PSM             | P > z   | IPW             | P > z   | IPWRA           | P > z   |
| Absence of Colocation  | 0.098           | (0.015) | 0.129           | (0.020) | 0.133           | (0.008) |
| SE                     | (0.041)         |         | (0.055)         |         | (0.050)         |         |
| 95% CI                 | [0.019, 0.178]  |         | [0.020, 0.238]  |         | [0.034, 0.232]  |         |
| Presence of Colocation | 0.005           | (0.339) | 0.011           | (0.246) | 0.021           | (0.422) |
| SE                     | (0.006)         |         | (0.009)         |         | (0.026)         |         |
| 95% CI                 | [-0.006, 0.017] |         | [-0.008, 0.031] |         | [-0.030, 0.073] |         |
